# Supplementary material for: Effectiveness of endolymphatic duct blockage versus endolymphatic sac decompression in patients with intractable Ménière’s disease: study protocol for a double-blinded, randomised controlled trial
Source: PubMed Central journal article supplement — BMJ Open. 2021 Aug 10;11(8):e054514. doi: 10.1136/bmjopen-2021-054514 (PMC8356157; doi:10.1136/bmjopen-2021-054514), 2021-08-10
Supplement: bmjopen-2021-054514supp001.pdf [file bmjopen-2021-054514supp001.pdf]

**Proefpersoneninformatie EDB bij de ziekte van Ménière – Juni 2021**

Proefpersoneninformatie

# Proefpersoneninformatie voor deelname aan medisch-wetenschappelijk onderzoek

**EDB-operatie bij de ziekte van Ménière**

*Officiële titel: “De effectiviteit van endolymfatische ductusblokkade versus endolymfatische saccusdecompressie bij patiënten met oncontroleerbare ziekte van Ménière.”*

**Inleiding**

Geachte heer/mevrouw,

Met deze informatiebrief willen we u vragen of u wilt meedoen aan medisch-wetenschappelijk onderzoek. Meedoen is vrijwillig. U krijgt deze brief omdat u de ziekte van Ménière heeft. U leest hier om wat voor onderzoek het gaat, wat het voor u betekent, en wat de voordelen en nadelen zijn. Het is veel informatie. Wilt u de informatie doorlezen en beslissen of u wilt meedoen? Als u wilt meedoen, kunt u het formulier invullen dat u vindt in bijlage E.

**Stel uw vragen**

U kunt uw beslissing nemen met de informatie die u in deze informatiebrief vindt. Daarnaast raden we u aan om dit te doen:

- Stel vragen aan de onderzoeker die u deze informatie geeft.
- Praat met uw partner, familie of vrienden over dit onderzoek.
- Stel vragen aan de onafhankelijk deskundige, dr. Van der Schroeff
- Lees de informatie op [www.rijksoverheid.nl/mensenonderzoek](http://www.rijksoverheid.nl/mensenonderzoek).

**1. Algemene informatie**

Het HagaZiekenhuis, het Haaglanden Medisch Centrum en het Leids Universitair Medisch Centrum hebben dit onderzoek opgezet. Hieronder noemen we het HagaZiekenhuis steeds de ‘opdrachtgever’. Onderzoekers (dit kunnen artsen, onderzoeksverpleegkundigen en fysiotherapeuten zijn) voeren het onderzoek uit in verschillende ziekenhuizen.

In deze informatiefolder wordt gesproken over ‘de onderzoeker’. Dat is de KNO-arts die uw deelname aan deze studie regelt. Hij of zij is ook degene die bij de operatie aanwezig is en bij wie u terugkomt na de operatie. Hierover leest u meer in paragraaf 4.

Omdat niet alle KNO-artsen in Nederland meedoen met deze studie, is dit soms een andere arts dan uw eigen.

Voor dit onderzoek zijn in totaal 84 proefpersonen nodig.

**Proefpersoneninformatie EDB bij de ziekte van Ménière – Juni 2021**

Proefpersoneninformatie

De medisch-ethische toetsingscommissie van Leiden Den Haag Delft (METC LDD) heeft dit onderzoek goedgekeurd.

**2. Wat is het doel van het onderzoek?**

Er is een nieuwe operatietechniek bedacht als behandeling voor de ziekte van Ménière. Die operatie heet 'Endolymfatische DuctusBlokade', afgekort EDB. In dit onderzoek bekijken we of proefpersonen na deze operatie minder duizeligheidsaanvallen hebben. We vergelijken hen met patiënten die een soortgelijke operatie krijgen, waarbij de ductus niet geblokkeerd wordt. Deze operatie heet 'endolymfatisch saccusdecompressie'. Behalve het clipje, lijken de operaties heel erg op elkaar.

In dit onderzoek zoeken we uit of EDB na 1 jaar betere resultaten geeft, dan de operatie waarbij de ductus niet geblokkeerd wordt.

**3. Achtergrond van het onderzoek**

In 2015 is deze nieuwe operatie voor de ziekte van Ménière bedacht. In Canada is de eerste groep patiënten geopereerd. Daar was 2 jaar na de operatie 95% van de deelnemers aanvalsvrij. Dat waren er meer dan in de controlegroep, die een andere operatie kregen. Dit onderzoek is echter niet helemaal goed uitgevoerd. Daardoor is niet zeker of de operatie echt zo goed is.

Omdat er geen zekerheid is over het effect van EDB, wordt de operatie in Nederland nog niet door de zorgverzekeraars vergoed.

Twee Nederlandse KNO-artsen hebben de operatie ook al een aantal keer uitgevoerd. Dit gebeurde in het buitenland. Ook bij deze groep waren de resultaten goed.

**4. Hoe verloopt het onderzoek?**

*Hoelang duurt het onderzoek?*

Doet u mee met het onderzoek? Dan duurt dat in totaal ongeveer 1.5 jaar.

*Stap 1: bent u geschikt om mee te doen?*

We willen eerst weten of u geschikt bent om mee te doen. Daarom doet de onderzoeker een aantal onderzoeken:

- De onderzoeker bespreekt uw klachten met u.
- Lichamelijk onderzoek. De onderzoeker doet een aantal simpele testjes om het evenwichtsorgaan en het gehoor te testen.
- Evenwichtsonderzoek. Hierbij wordt wat warm en koud water in uw oren gespoten.
- Een MRI-scan. Bij deze MRI-scan wordt contrastmiddel (gadolinium) gebruikt. U krijgt dit via een infuus. De scan wordt 4 uur na het infuus gemaakt. In de tussentijd mag u doen wat u wilt.

**Proefpersoneninformatie EDB bij de ziekte van Ménière – Juni 2021**

## Proefpersoneninformatie

- Een CT-scan.
- Een hoortest.

Als u dat eerder nog niet gehad heeft, krijgt u als behandeling tegen de duizeligheidsaanvallen eerst een injectie met medicatie in het oor. Deze prikjes door het trommelvlies helpen bij sommige patiënten met de ziekte van Ménière goed. Omdat dit een minder zware behandeling is dan een operatie, wordt dit altijd eerst geprobeerd. Dit is allemaal nog 'reguliere zorg' en valt niet binnen het onderzoek.

*Stap 2: voorafgaand aan de operatie*

Als u mee doet aan de operatie, vinden de volgende onderzoeken vóór de operatie plaats:

- Vragenlijsten. Via de email ontvangt u verschillende vragenlijsten. Het is van groot belang dat u deze allemaal voor de operatie invult.
- Fysiotherapie. U gaat langs bij de fysiotherapeut, die een aantal metingen en oefeningen met u doet.
- Bezoek aan de anesthesioloog. U krijgt een afspraak bij de anesthesioloog, die bekijkt of u fit genoeg bent voor een operatie. Dit is een standaardbezoek.
- U installeert de 'DizzyQuest App' op uw telefoon. Hier vult u dagelijks een vragenlijst in.
- Er wordt een CT-scan gemaakt.

*Stap 3: de operatie*

Alle patiënten die meedoen aan dit onderzoek worden geopereerd.

Voor dit onderzoek maken we 2 groepen:

- Groep 1. De mensen in deze groep krijgen een nieuwe operatietechniek, EDB. Hierbij wordt een clip geplaatst over de ductus endolymphaticus (*zie bijlage D*). Dit is een nieuwe operatietechniek. Er is nog onvoldoende bewijs dat deze operatie goed werkt.
- Groep 2. Bij deelnemers in deze groep wordt dezelfde procedure gevolgd, maar hierbij wordt géén clip geplaatst. Verder is de operatie hetzelfde. Deze techniek heet 'decompressie' omdat er bot wordt weggenomen. Hierdoor staat er minder druk op bijvoorbeeld de saccus endolymphaticus. In veel landen wordt deze operatie uitgevoerd als behandeling van de ziekte van Ménière.

In Nederland worden beide operaties op dit moment niet uitgevoerd omdat er niet voldoende bewijs is dat ze effectief zijn.

Loting bepaalt welke operatie u krijgt. U en de onderzoeker weten niet in welke groep u zit. Als het op enig moment voor uw gezondheid belangrijk is, kan dit wel worden opgezocht.

**Proefpersoneninformatie EDB bij de ziekte van Ménière – Juni 2021**

## Proefpersoneninformatie

Bij de operatie zijn twee artsen aanwezig. Eén arts is uw eigen KNO-arts. De andere arts heeft ervaring met deze operaties en werkt samen met uw arts. Op het moment van loting, verlaat uw arts de operatiekamer. Zo weet hij of zij niet in welke groep u zit.

*Stap 4: onderzoeken en metingen na de operatie*

Voor het onderzoek is het nodig dat u 4 keer in 12 maanden naar het ziekenhuis komt. Dit is 1 week na de operatie, en 3, 6 en 12 maanden na de operatie. Een bezoek duurt een half uur tot een uur.

We doen dan de volgende onderzoeken:

- We doen een lichamelijk onderzoek – bij alle bezoeken.
- Er wordt een MRI-scan gemaakt – 3 en 12 maanden na de operatie. Bij deze MRI-scans wordt contrastmiddel (gadolinium) gebruikt. U krijgt dit via een infuus. De scan wordt 4 uur na het infuus gemaakt. In de tussentijd mag u doen wat u wilt.
- Er wordt een hoortest gedaan – 3, 6 en 12 maanden na de operatie.
- Er wordt een evenwichtsonderzoek gedaan – 12 maanden na de operatie.
- Na elk bezoek krijgt u via de mail vragenlijsten. Deze vragenlijsten gaan over algemeen functioneren, duizeligheid en oorsuizen. Het invullen kost in totaal ongeveer een uur.

Daarnaast gaat de fysiotherapeut u behandelen. Na de operatie komt u 7 keer bij de fysiotherapeut. De fysiotherapeut doet metingen en oefeningen met u. Ook krijgt u oefeningen mee die u thuis moet doen.

Tot 1 jaar na de operatie vult u elke dag een vragenlijst in de DizzyQuest App in. Het invullen duurt 5 tot 10 minuten. De vragen gaan over uw functioneren op die dag.

Als ook de laatste proefpersoon 1 jaar lang gevolgd is, kunt u ervoor kiezen te horen in welke groep u zit. Als blijkt dat u in de EBD-groep zat, en u heeft nog aanvallen, dan kunt u een CT-scan krijgen om te zien of de clip goed zit.

In bijlage C staat uitgebreid beschreven welke handelingen, tests en onderzoeken er bij elk van die bezoeken plaatsvinden.

*Wat is er anders dan bij gewone zorg?*

Het eerste bezoek aan de polikliniek is 'reguliere zorg'. Hiervoor moet u dus mogelijk eigen risico betalen.

Als u in aanmerking komt om mee te doen aan het onderzoek, worden alle bezoeken en onderzoeken betaald door het onderzoek. Hier hoeft u dus geen eigen risico voor te betalen.

Niet alle KNO-artsen in Nederland doen mee aan dit onderzoek. Het kan dus zijn dat u, vanwege deelname aan het onderzoek, zal worden behandeld door een andere KNO-arts dan uw vaste KNO-arts.

**Proefpersoneninformatie EDB bij de ziekte van Ménière – Juni 2021**

Proefpersoneninformatie

Ook kan zijn dat u voor sommige onderzoeken of behandelingen naar een ander ziekenhuis moet. Dit heeft te maken met de aanwezigheid van instrumenten en de opleiding van de zorgverleners.

**5. Welke afspraken maken we met u?**

Om het onderzoek goed te laten verlopen, is het belangrijk dat u zich aan de volgende afspraken houdt.

De afspraken zijn dat u:

- Indien u betahistine of cinnarizine gebruikt, deze vanaf 24 uur vóór de operatie niet meer neemt.
- Afspraken voor bezoeken nakomt.
- Niet aan een ander medisch-wetenschappelijk onderzoek meedoet.
- De vragenlijst in de DizzyQuest App dagelijks invult. Dit is van zeer groot belang. Of u de app invult, wordt gecontroleerd door de coördinerend onderzoeker. Indien blijkt dat u regelmatig vergeet de lijst in te vullen, neemt zij telefonisch contact met u op.
- De vragenlijsten via de email invult.
- De oefeningen van de fysiotherapie thuis volgens schema uitvoert.
- U krijgt een deelnamekaart, waarin staat dat u deelneemt aan dit onderzoek. Indien er een scan van uw hoofd gemaakt wordt (buiten het onderzoek om), is het van belang dat u aan de arts die de scan afspreekt, vertelt dat u meedoet met dit onderzoek en dit kaartje laat zien.

Het is belangrijk dat u contact opneemt met de onderzoeker:

- Als u in een ziekenhuis wordt opgenomen of behandeld.
- Als u plotseling gezondheidsklachten krijgt.
- Als u niet meer wilt meedoen aan het onderzoek.
- Als uw contactgegevens wijzigen.

**Zwangerschap**

Vrouwen die zwanger zijn, kunnen niet meedoen aan dit onderzoek. Ook mogen vrouwen niet zwanger worden tijdens het onderzoek. Dit is omdat narcose niet veilig is voor een zwangerschap. Daarnaast wordt tijdens het onderzoek een CT-scan gemaakt. De straling is een risico voor het kind.

Wordt u tijdens het onderzoek toch zwanger? Laat dit dan direct weten aan de onderzoeker. U moet dan in overleg met de onderzoeker zo snel mogelijk stoppen met dit onderzoek.

**6. Van welke bijwerkingen, nadelige effecten of ongemakken kunt u last krijgen?**

**Proefpersoneninformatie EDB bij de ziekte van Ménière – Juni 2021**

## Proefpersoneninformatie

Er kunnen bijwerkingen en complicaties voorkomen bij beide operaties. De volgende bijwerkingen zijn bekend:

- Pijn achter het oor.
- Tijdelijke misselijkheid.
- Tijdelijke duizeligheid.
- Tijdelijk (bescheiden) gehoorverlies.

Complicaties van de operaties kunnen zijn:

- Schade aan de aangezichtszenuw. Tot nu toe gebeurt dit bij minder dan 1% van de patiënten.
- Schade aan het evenwichtsorgaan.
- Lekkage van hersenvocht.
- Ontsteking van de hersenen (meningitis).
- Tijdelijke positieduizeligheid (BPPD).
- Gehoorverlies. Dit komt voor bij minder dan 4% van de patiënten.

**7. Wat zijn de voordelen en de nadelen als u meedoet aan het onderzoek?**

Meedoen aan het onderzoek kan voordelen en nadelen hebben. Hieronder zetten we ze op een rij. Denk hier goed over na, en praat erover met anderen.

De operaties kunnen het aantal Ménière-aanvallen verminderen, maar zeker is dat niet. Op elk moment tijdens dit onderzoek kunnen de aanvallen terugkomen of verergeren.

Meedoen aan het onderzoek kan deze nadelen hebben:

- Mogelijke bijwerkingen en complicaties van de operatie
- Mogelijke ongemakken van de metingen in het onderzoek. U kunt bijvoorbeeld duizelig worden tijdens het evenwichtsonderzoek

Deelname aan het onderzoek betekent ook:

- Dat u extra tijd kwijt bent;
- Extra testen en onderzoeken;
- Dat u afspraken heeft waaraan u zich moet houden;

*Wat zijn de nadelen van onderzoeken die gebruik maken van straling?*

Bij de CT-scan voor de operatie gebruiken we röntgenstraling. U krijgt 1 of 3 CT-scans. Dit hangt af van in welke groep u zit.

Een CT-scan geeft ongeveer 2 mSv stralingsbelasting. Ter vergelijking: de achtergrondstraling in Nederland is ~2,5 mSv per jaar.

**Proefpersoneninformatie EDB bij de ziekte van Ménière – Juni 2021**

## Proefpersoneninformatie

Het kan geen kwaad als u voor een medische reden een onderzoek of behandeling met straling moet ondergaan.

- Krijgt u vaker een onderzoek met straling? Bespreek dan met de onderzoeker of het verstandig is dat u meedoet.
- De straling die we tijdens het onderzoek gebruiken kan leiden tot schade aan uw gezondheid. Maar dit is een klein risico. Wel adviseren we u de komende tijd niet nog een keer mee te doen aan een wetenschappelijk onderzoek met straling.

Het is mogelijk dat u voor een ander medisch probleem een scan van het hoofd moet krijgen. Dat is geen probleem voor het onderzoek. Het clipje dat gebruikt wordt in dit onderzoek, kan zonder problemen in de MRI- of CT-scan.

Wel is het belangrijk dat u aan de arts die de scan met u afspreekt, vertelt dat u meedoet aan dit onderzoek. U kunt dan het zakkaartje laten zien. Daarop staat dat er geen bezwaar is om een scan te ondergaan, maar vragen wij de radioloog niks te zeggen over een eventuele clip. Dit is om te zorgen dat u niet weet in welke groep u zit. De radioloog schrijft in het verslag van de scan op dat er gekeken is of er een clip gezien is, maar dat daar vanwege het onderzoek niks over in het verslag opgeschreven wordt.

Het is mogelijk dat er op de CT-scan of MRI-scan toevallig iets wordt ontdekt dat niet direct van belang is voor het onderzoek maar wel voor uw gezondheid of die van uw familieleden. In dit geval zal uw eigen huisarts of specialist met u bespreken wat er verder moet gebeuren. De kosten hiervan vallen onder uw eigen zorgverzekering.

*Wilt u niet meedoen?*

U beslist zelf of u meedoet aan het onderzoek. Wilt u niet meedoen? Dan krijgt u de gewone behandeling voor de ziekte van Ménière. Uw arts kan u meer vertellen over de behandelingsmogelijkheden die er zijn. En over de voor- en nadelen daarvan.

**8. Wanneer stopt het onderzoek?**

De onderzoeker laat het u weten als er nieuwe informatie over het onderzoek komt die belangrijk voor u is. De onderzoeker vraagt u daarna of u blijft meedoen.

In deze situaties stopt voor u het onderzoek:

- Alle onderzoeken volgens het schema zijn voorbij.
- Het einde van het hele onderzoek is bereikt, dus als er 84 mensen zijn geopereerd en zij allemaal een jaar lang gevolgd zijn.
- U bent zwanger geworden.
- U wilt zelf stoppen met het onderzoek. Dat mag op ieder moment. Meld dit dan meteen bij de onderzoeker. U hoeft er niet bij te vertellen waarom u stopt. U krijgt dan weer de gewone behandeling voor de ziekte van Ménière. De onderzoeker kan voor uw veiligheid nog een of meer controles afspreken.

**Proefpersoneninformatie EDB bij de ziekte van Ménière – Juni 2021**

## Proefpersoneninformatie

- De onderzoeker vindt het beter voor u om te stoppen. De onderzoeker zal u nog wel uitnodigen voor een nacontrole.
- Een van de volgende instanties besluit dat het onderzoek moet stoppen:
  - Het HagaZiekenhuis, of
  - Het Zorginstituut Nederland, of
  - de overheid, of
  - de medisch-ethische commissie die het onderzoek beoordeelt.

*Wat gebeurt er als u stopt met het onderzoek?*

Als u niet meer mee wil doen met het onderzoek, mag u dat op elk moment aangeven. U hoeft niet uit te leggen waarom u niet meer mee wil doen. U kunt dit melden bij uw eigen KNO-arts; hij/zij zal contact opnemen met de coördinerend onderzoeker om dit te melden. De onderzoekers gebruiken de gegevens die tot het moment van stoppen zijn verzameld.

Het hele onderzoek is afgelopen als alle deelnemers klaar zijn.

**9. Wat gebeurt er na het onderzoek?***Krijgt u de resultaten van het onderzoek?*

Ongeveer 1.5 jaar na uw deelname laat de onderzoeker u weten wat de belangrijkste uitkomsten zijn van het onderzoek. De onderzoeker kan u ook vertellen in welke groep u zat, dus welke operatie u gehad heeft. Wilt u dit niet weten? Zeg dat dan tegen de onderzoeker. Hij of zij zal het u dan niet vertellen.

Het kan zijn dat blijkt dat de EDB-operatie beter werkte. Als u niet in de EDB-groep zat, en nog wel aanvallen heeft, kunt u alsnog de EDB-operatie krijgen.

**10. Wat doen we met uw gegevens?**

Doet u mee met het onderzoek? Dan geeft u ook toestemming om uw gegevens te verzamelen, gebruiken en bewaren.

*Welke gegevens bewaren we?*

We bewaren deze gegevens:

- uw naam
- uw geslacht
- uw adres
- uw geboortedatum
- gegevens over uw gezondheid
- (medische) gegevens die we tijdens het onderzoek verzamelen

*Waarom verzamelen, gebruiken en bewaren we uw gegevens?*



**Proefpersoneninformatie EDB bij de ziekte van Ménière – Juni 2021**

## Proefpersoneninformatie

We verzamelen, gebruiken en bewaren uw gegevens om de vragen van dit onderzoek te kunnen beantwoorden. En om de resultaten te kunnen publiceren. De gegevens worden verzameld in Castor, een online omgeving voor onderzoekers.

*Hoe beschermen we uw privacy?*

Om uw privacy te beschermen geven wij uw gegevens een code. Op al uw gegevens zetten we alleen deze code. De sleutel van de code bewaren we op een beveiligde plek in het ziekenhuis waar u behandeld wordt. Als we uw gegevens verwerken, gebruiken we steeds alleen die code. Ook in rapporten en publicaties over het onderzoek kan niemand terughalen dat het over u ging.

De gegevens die in de DizzyQuest App worden verzameld, zijn ook niet gekoppeld aan uw naam. In de app staat alleen uw deelnemerscode. De personen die de ingevulde gegevens in de app kunnen zien, zijn:

- De coördinerend onderzoeker. Zij bekijkt of u de app invult.
- De maker van de app. Hij kan gegevens inzien voor kwaliteits- en veiligheidsdoeleinden. Hij kan geen gegevens zien die naar u zijn te herleiden.
- Een onafhankelijk arts heeft toegang tot de database. Deze arts zal niet inloggen, tenzij de coördinerend onderzoeker onverwachts niet meer in staat is het onderzoek uit te voeren. Deze arts kan dan de toegang en verantwoordelijkheden overdragen aan een nieuwe coördinerend onderzoeker.

Er wordt bijgehouden en gecontroleerd wie de gegevens van de app opent en inziet.

*Wie kunnen uw gegevens zien?*

Sommige personen kunnen wel uw naam en andere persoonlijke gegevens zonder code inzien. Dit zijn mensen die controleren of de onderzoekers het onderzoek goed en betrouwbaar uitvoeren. Deze personen kunnen bij uw gegevens komen:

- Leden van de commissie die de veiligheid van het onderzoek in de gaten houdt.
- Een controleur die door het HagaZiekenhuis is ingehuurd of voor het HagaZiekenhuis werkt.
- Nationale toezichthoudende autoriteiten namelijk Inspectie Gezondheidszorg en Jeugd.

Deze personen houden uw gegevens geheim. Wij vragen u voor deze inzage toestemming te geven.

*Hoelang bewaren we uw gegevens en lichaamsmateriaal?*

We bewaren uw gegevens 15 jaar in Castor. Dit is de online omgeving waar alle gegevens worden opgeslagen.

*Mogen we uw gegevens gebruiken voor ander onderzoek?*

Uw gegevens kunnen na afloop van dit onderzoek ook nog van belang zijn voor ander wetenschappelijk onderzoek op het gebied van de ziekte van Ménière. Daarvoor zullen uw gegevens 15 jaar worden bewaard in Castor. In het toestemmingformulier geeft u aan of u dit

**Proefpersoneninformatie EDB bij de ziekte van Ménière – Juni 2021**

Proefpersoneninformatie

goed vindt. Geeft u geen toestemming? Dan kunt u nog steeds meedoen met dit onderzoek. U krijgt dezelfde zorg.

*Wat gebeurt er bij onverwachte ontdekkingen?*

Tijdens het onderzoek kunnen we toevallig iets vinden dat belangrijk is voor uw gezondheid. De onderzoeker neemt dan contact op met uw eigen KNO-arts. U bespreekt dan met uw specialist wat er moet gebeuren. U geeft met het formulier toestemming voor het informeren van uw specialist.

*Kunt u uw toestemming voor het gebruik van uw gegevens weer intrekken?*

U kunt uw toestemming voor het gebruik van uw gegevens op ieder moment intrekken. Dit geldt voor het gebruik in dit onderzoek en voor het gebruik in ander onderzoek. Maar let op: trekt u uw toestemming in, en hebben onderzoekers dan al gegevens verzameld voor een onderzoek? Dan mogen zij deze gegevens nog wel gebruiken.

*Wilt u meer weten over uw privacy?*

- Wilt u meer weten over uw rechten bij de verwerking van persoonsgegevens? Kijk dan op [www.autoriteitpersoonsgegevens.nl](http://www.autoriteitpersoonsgegevens.nl).
- Heeft u vragen over uw rechten? Of heeft u een klacht over de verwerking van uw persoonsgegevens? Neem dan contact op met degene die verantwoordelijk is voor de verwerking van uw persoonsgegevens. Voor uw onderzoek is dat:
  - Het HagaZiekenhuis. Zie bijlage A voor contactgegevens, en website.
- Als u klachten heeft over de verwerking van uw persoonsgegevens, raden we u aan om deze eerst te bespreken met het onderzoeksteam. U kunt ook naar de Functionaris Gegevensbescherming van het HagaZiekenhuis gaan. Of u dient een klacht in bij de Autoriteit Persoonsgegevens.

*Waar vindt u meer informatie over het onderzoek?*

Op de volgende website(s) vindt u meer informatie over het onderzoek.

<https://www.hagaziekenhuis.nl/meniere>

<https://www.trialregister.nl/trial/9095> (Let op: deze website is in het Engels). Na het

onderzoek kan de website een samenvatting van de resultaten van dit onderzoek tonen.

**11. Krijgt u een vergoeding als u meedoet aan het onderzoek?**

De **extra** ziekenhuisbezoeken, onderzoeken en de operatie voor het onderzoek kosten u niets. U krijgt geen vergoeding als u meedoet aan dit onderzoek. Wel krijgt u een vergoeding voor uw (extra) reiskosten. De gemaakte reiskosten worden aan het eind van uw deelname aan u vergoed. U dient altijd kopieën te maken van de parkeerkaartjes en/of ov-bewijzen. Voor het berekenen van de reiskosten gebruiken wij de ANWB-routeplanner en rekenen wij €0,19 per kilometer. Voor het berekenen van kosten van het openbaar vervoer gebruiken wij OV9292.

**Proefpersoneninformatie EDB bij de ziekte van Ménière – Juni 2021**

Proefpersoneninformatie

**12. Bent u verzekerd tijdens het onderzoek?**

Voor iedereen die meedoet aan dit onderzoek is een verzekering afgesloten. De verzekering betaalt voor schade door het onderzoek. Maar niet voor alle schade. In **bijlage B** vindt u meer informatie over de verzekering en de uitzonderingen. Daar staat ook aan wie u schade kunt melden.

**13. We informeren uw huisarts**

De onderzoeker stuurt uw huisarts een brief om te laten weten dat u meedoet aan het onderzoek. Dit is voor uw eigen veiligheid.

**14. Heeft u vragen?**

Bij vragen kunt u contact opnemen met arts-onderzoeker Jet Schenck via [duizeligheid@hagaziekenhuis.nl](mailto:duizeligheid@hagaziekenhuis.nl). Wilt u advies van iemand die geen belang heeft bij het onderzoek? Neem dan contact op met professor dr. Bruintjes, KNO-arts. Hij weet veel over het onderzoek, maar werkt niet mee aan dit onderzoek.

Heeft u een klacht? Bespreek dit dan met de onderzoeker of de arts die u behandelt. Wilt u dit liever niet? Ga dan naar de klachtenfunctionaris van uw eigen ziekenhuis. In bijlage A staat waar u die kunt vinden.

**15. Ondertekening toestemmingsformulier**

U kunt eerst rustig nadenken over dit onderzoek. Binnen twee weken vertelt u de onderzoeker of u de informatie begrijpt en of u wel of niet wilt meedoen. Wilt u meedoen? Dan vult u het toestemmingsformulier in dat u bij deze informatiebrief vindt. U en de onderzoeker krijgen allebei een getekende versie van deze toestemmingsverklaring.

Dank voor uw tijd.

[Lokale hoofdonderzoeker], [lokaal ziekenhuis]

Het onderzoeksteam:

- Drs. A.A. Schenck, arts-onderzoeker KNO-heelkunde, HagaZiekenhuis, Den Haag
- Dr. H. Blom, KNO-arts, HagaZiekenhuis, Den Haag
- Drs. J.M. Kruijt, KNO-arts, Haaglanden Medisch Centrum, Den Haag
- Prof. dr. P.P. van Benthem, afdelingshoofd KNO, LUMC, Leiden

**Proefpersoneninformatie EDB bij de ziekte van Ménière – Juni 2021**

Proefpersoneninformatie

**16. Bijlagen bij deze informatie**

|            |                                          |
|------------|------------------------------------------|
| Bijlage A. | Contactgegevens                          |
| Bijlage B. | Informatie over de verzekering           |
| Bijlage C. | Schema bezoeken en metingen              |
| Bijlage D. | Uitgebreide informatie over de operaties |
| Bijlage E. | Toestemmingsformulier(en)                |

**Proefpersoneninformatie EDB bij de ziekte van Ménière – Juni 2021**

Proefpersoneninformatie

**Bijlage A: contactgegevens voor [naam deelnemend centrum]**

[Onderzoeker]: [Naam, contactgegevens en bereikbaarheid]

Onafhankelijk arts: dr. Van der Schroeff, KNO-arts Erasmus Medisch Centrum Rotterdam

Telefoon: (010) 703 60 73

Klachten: [dienst of persoon met contactgegevens en bereikbaarheid]

Functionaris voor de Gegevensbescherming van de instelling:

Voor meer informatie over uw rechten: [Contactgegevens [inclusief website] van de verantwoordelijke(n) voor de verwerking van persoonsgegevens]:

Coördinerend onderzoeker

Drs. A.A. Schenck

Afdeling KNO-heelkunde, HagaZiekenhuis, Den Haag

Email: [duizeligheid@hagaziekenhuis.nl](mailto:duizeligheid@hagaziekenhuis.nl)

Telefoon: 070 210 2602

**Proefpersoneninformatie EDB bij de ziekte van Ménière – Juni 2021**

Proefpersoneninformatie

**Bijlage B: informatie over de verzekering**

Het HagaZiekenhuis heeft een verzekering afgesloten voor iedereen die meedoet aan het onderzoek. De verzekering betaalt de schade die u heeft doordat u aan het onderzoek meedeed. Het gaat om schade die u krijgt tijdens het onderzoek, of binnen 4 jaar na het onderzoek. U moet schade binnen 4 jaar melden bij de verzekeraar.

Heeft u schade door het onderzoek? Meld dit dan telefonisch bij deze verzekeraar:

De verzekeraar van het onderzoek is:

Naam: CentraMed  
Adres: Postbus 7374, 2701 AJ Zoetermeer  
Telefoonnummer: 070 301 70 70  
E-mail: [info@centramed.nl](mailto:info@centramed.nl)  
(Polisnummer: 624.100.025)

De verzekering betaalt maximaal € 650.000 per proefpersoon en € 5.000.000 voor het hele onderzoek (en € 7.500.000 per jaar voor alle onderzoeken van dezelfde opdrachtgever).

Let op: de verzekering dekt de volgende schade **niet**:

- Schade door een risico waarover we u informatie hebben gegeven in deze brief. Maar dit geldt niet als het risico groter bleek te zijn dan we van tevoren dachten. Of als het risico heel onwaarschijnlijk was.
- Schade aan uw gezondheid die ook zou zijn ontstaan als u niet aan het onderzoek had meegedaan.
- Schade die ontstaat doordat u aanwijzingen of instructies niet of niet goed opvolgde.
- Schade aan de gezondheid van uw kinderen of kleinkinderen.
- Schade door een behandelmethode die al bestaat. Of door onderzoek naar een behandelmethode die al bestaat.

Deze bepalingen staan in het 'Besluit verplichte verzekering bij medisch-wetenschappelijk onderzoek met mensen 2015'. Dit besluit staat in de Wettenbank van de overheid (<https://wetten.overheid.nl>).

**Proefpersoneninformatie EDB bij de ziekte van Ménière – Juni 2021**

Proefpersoneninformatie

**Bijlage C – Overzicht bezoeken en metingen****Voorafgaand aan het onderzoek**

Als u gaat deelnemen aan de studie, vult u met uw arts uw toestemmingsformulier in.

Daarnaast worden de volgende metingen uitgevoerd:

- Head impulse test (vHIT). Hierbij houdt de onderzoeker met beide handen uw hoofd vast, en vraagt hij u om naar de neuspunt van de onderzoeker te kijken. Met een korte en snelle beweging wordt uw hoofd horizontaal naar rechts en vervolgens naar links gedraaid. De onderzoeker kijkt hierbij naar uw oogbewegingen.
- Hoortest
- CT-scan
- Een evenwichtsonderzoek waarbij koud en warm water in uw oor gespoten wordt

Ook ontvangt u de volgende vragenlijsten via de email:

- Hospital Anxiety and Depression Scale (HADS)
- Dizziness Handicap Inventaris (DHI): een algemene vragenlijst over duizeligheid
- Tinnitus Handicap Inventaris (THI): een algemene vragenlijst over oorsuizen
- Functional Level Scale (FLS): schaalverdeling waarin u kunt aangeven hoe u vindt dat u dagelijks functioneert
- EQ-5D: 5 vragen en een schaalverdeling waarmee u kunt aangeven hoe u uw gezondheidstoestand ervaart.
- SF-36: waarmee u uw mogelijkheden van functioneren in dagelijks activiteiten, vrijetijd en werk kan aangeven.
- NPQ: dit is een vragenlijst over duizeligheid
- VAP: dit is een vragenlijst over de last van duizeligheid in uw dagelijks functioneren
- VADL: ook deze vragenlijst gaat over last van duizeligheid in uw dagelijks functioneren
- Een vragenlijst over uw verwachtingen van het onderzoek

Tot slot komt u vlak voor de operatie langs bij de anesthesioloog voor standaard onderzoek.

Hier beoordeelt de anesthesioloog of u fit genoeg bent voor een operatie.

**1 week na de operatie**

- Controleafspraak bij uw KNO-arts
- Lichamelijk onderzoek
- Bezoek fysiotherapeut voor metingen en oefeningen

**In de daaropvolgende weken**

- In totaal 3 afspraken bij de fysiotherapeut. Die doet steeds oefeningen met u en voert metingen uit.

**Proefpersoneninformatie EDB bij de ziekte van Ménière – Juni 2021**

Proefpersoneninformatie

**3 maanden na de operatie**

U komt weer terug bij de KNO-arts. Dan worden de volgende tests gedaan:

- Lichamelijk onderzoek
- MRI-scan. Bij deze MRI-scans wordt contrastmiddel (gadolinium) gebruikt. U krijgt dit via een infuus. De scan wordt 4 uur na het infuus gemaakt. In de tussentijd mag u doen wat u wilt.
- Hoortest

Ook krijgt u de volgende vragenlijsten via de email:

- DHI
  - THI
  - FLS
  - EQ-5D
  - VAS
  - SF-36
  - iMCQ: deze vraagt uit hoeveel zorg u gehad heeft (aantal polikliniekbezoeken, onverwachte opnames)
  - iPCQ: deze vraagt uit hoe 'productief' u bent geweest, dus of/hoeveel u heeft kunnen werken.
- Bezoek fysiotherapie voor metingen en het afronden van de behandeling.

**6 maanden na de operatie**

U komt weer terug bij de KNO-arts. Dan worden de volgende tests gedaan:

- Lichamelijk onderzoek
- Hoortest

Ook krijgt u de volgende vragenlijsten via de email:

- DHI
  - THI
  - FLS
  - EQ-5D
  - VAS
  - SF-36
  - iMCQ
  - iPCQ
- Bezoek fysiotherapie voor metingen

**12 maanden na de operatie**

U komt weer terug bij de KNO-arts. Dan worden de volgende tests gedaan:

- Lichamelijk onderzoek
- MRI-scan. Bij deze MRI-scans wordt contrastmiddel (gadolinium) gebruikt. U krijgt dit via een infuus. De scan wordt 4 uur na het infuus gemaakt. In de tussentijd mag u doen wat u wilt.
- Hoortest
- Een evenwichtsonderzoek



**Proefpersoneninformatie EDB bij de ziekte van Ménière – Juni 2021**

Proefpersoneninformatie

Ook krijgt u de volgende vragenlijsten via de email:

- DHI
  - THI
  - FLS
  - EQ-5D
  - VAS
  - SF-36
  - NPQ
  - iMCQ
  - iPCQ
  - VAP
  - VADL
- Bezoek fysiotherapie voor metingen
- Als blijkt dat u in de EDB-groep zat, krijgt u ook een CT-scan om te controleren of het clipje goed zit.

**Proefpersoneninformatie EDB bij de ziekte van Ménière – Juni 2021**

Proefpersoneninformatie

**Bijlage D – Uitgebreide informatie over de operaties**

In dit onderzoek worden twee verschillende operaties uitgevoerd. Deze operaties lijken op elkaar, maar zijn niet exact hetzelfde. In deze bijlage kunt u meer informatie vinden over de operaties.

**Anatomie van het oor**

Ten eerste leggen wij u de anatomie van het oor uit. Hieronder ziet u een plaatje van het rechteroor, alsof u iemand van voren aankijkt.

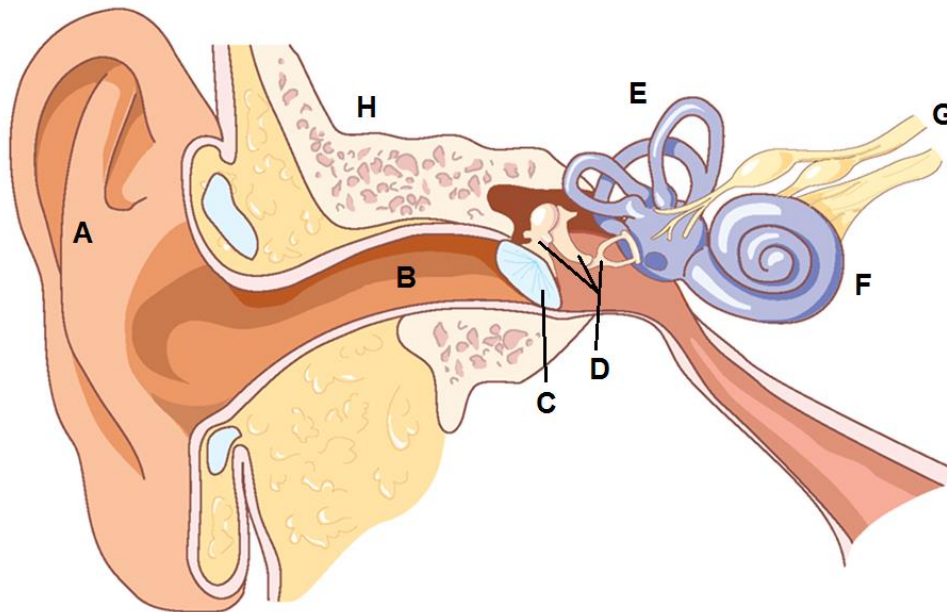

Figuur 1. Het oor. Bron: Leerschool audicien

A is de oorschelp en B de gehoorgang. De gehoorgang eindigt bij het trommelvlies (C). Geluid is een luchtrilling, het trommelvlies geeft die trillingen via de gehoorbeentjes (D) door naar het binnenoor.

Het binnenoor bestaat uit het evenwichtsorgaan (E) en het slakkenhuis (F). Het evenwichtsorgaan (E) bestaat uit drie halfcirkelvormige kanalen die bewegingen meten. Die kanalen meten allemaal een *nét* andere beweging. Het ene halfcirkelvormige kanaal meten bijvoorbeeld hoofdbewegingen van boven naar beneden, zoals bij ja schudden. Een van de andere meet bijvoorbeeld nee schudden. De bewegingen worden omgezet in elektrisch signaal, dat via de zenuw (G) naar de hersenen wordt doorgegeven. Het slakkenhuis (F) verwerkt geluiden. Trillingen die via het trommelvlies (C) en de gehoorbeentjes (D) in het binnenoor terechtkomen, worden in het slakkenhuis omgezet in elektrisch signaal. Ook dat signaal wordt via de zenuw (G) naar de hersenen gestuurd. Al deze structuren liggen in de schedel (H).

**Proefpersoneninformatie EDB bij de ziekte van Ménière – Juni 2021**

Proefpersoneninformatie

**Het binnenoor**

We kijken nu beter naar het binnenoor, waar het evenwichtsorgaan (E) en het slakkenhuis (F) onderdeel van uitmaken.

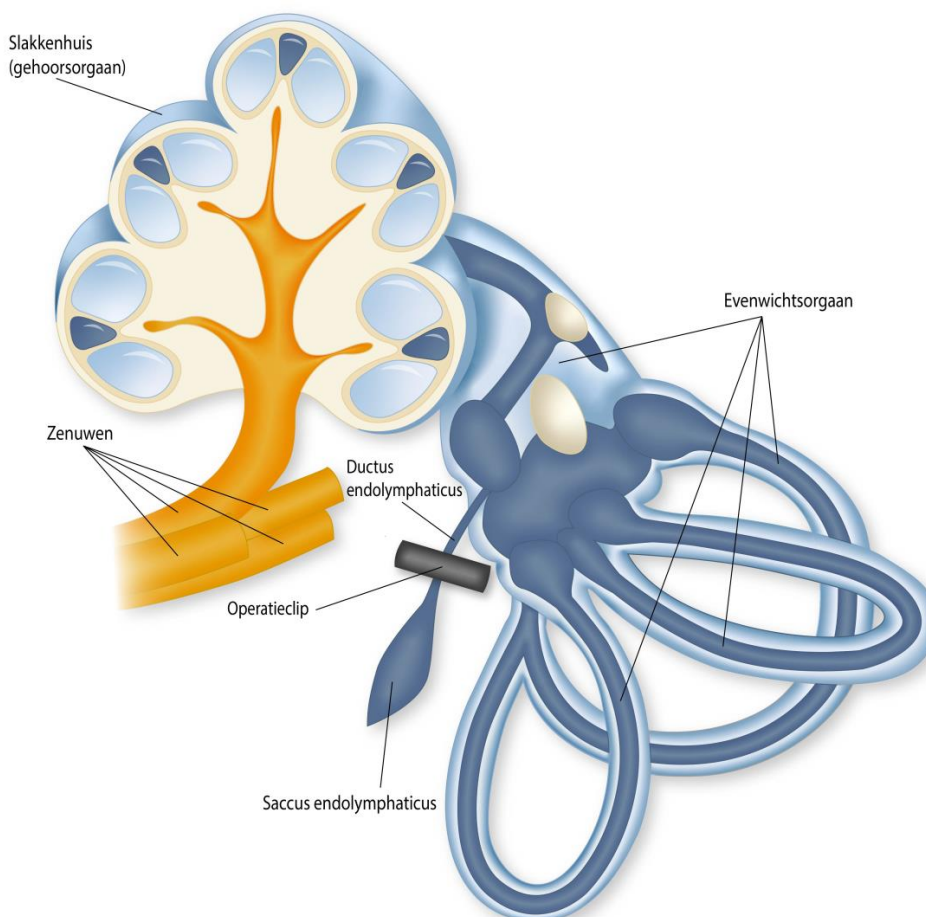

*Figuur 2. Het binnenoor. Bron en copyright: L. de Pont.*

Op Figuur 2 kunt u de halfcirkelvormige kanalen weer herkennen. Het slakkenhuis is ook afgebeeld, maar dan door de helft.

Op deze afbeeldingen staat een aantal structuren dat van belang is voor de ziekte van Ménière. Ten eerste de 'ductus endolymphaticus'. Dat is een uitloper van het evenwichtsorgaan, waar de halfcirkelvormige kanalen samenkomen. Aan het eind van de ductus endolymphaticus bevindt zich de 'saccus endolymphaticus'. Tussen de saccus endolymphaticus, het slakkenhuis en de halfcirkelvormige kanalen stroomt vloeistof: 'endolymfe'. Het endolymfe zorgt ervoor dat geluidsgolven goed worden voortgeleid en dat er signalen kunnen worden opgewekt in het evenwichtsorgaan en het gehoorsorgaan. Die signalen zorgen ervoor dat wij geluid horen en beweging kunnen voelen.

**Proefpersoneninformatie EDB bij de ziekte van Ménière – Juni 2021**

## Proefpersoneninformatie

Bij de ziekte van Ménière is er te veel endolymfe, zowel in het slakkenhuis als in het evenwichtsorgaan. Hierdoor zijn er symptomen van zowel het gehoor (oorsuizen, gehoorverlies) als van het evenwicht (de draaiduizeligheidsaanvallen).

Na een aanval kan het binnenoor zich een beetje herstellen, maar omdat de druk eigenlijk de hele tijd te hoog is, wordt dat steeds moeilijker. Daarom worden de problemen met gehoor en evenwicht met de tijd steeds groter.

Het is dus van belang om te zorgen dat die druk niet te hoog wordt. Momenteel is er een operatie die zorgt dat de saccus endolymfaticus meer ruimte krijgt. Daarvoor wordt wat bot van de schedel rondom deze saccus, voorzichtig weggeboord. Dit wordt ook wel 'endolymphatic sac decompression', ofwel drukvermindering van de saccus endolymfaticus, genoemd. Hierbij hebben de saccus en ductus endolymfaticus meer ruimte om uit te zetten, wanneer er teveel endolymfe (de vloeistof in het binnenoor) is. Deze operatie wordt in een aantal landen uitgevoerd, waaronder in Canada en Amerika. In Nederland wordt deze operatie niet uitgevoerd, omdat er niet voldoende bewijs is dat hij goed werkt.

Naast deze techniek, is er nu een nieuwe operatie bedacht. Deze heet 'endolymphatic duct blockage', ofwel blokkade van de ductus endolymfaticus. Het wordt afgekort tot EDB. Ook hierbij wordt ruimte vrijgemaakt rondom de saccus en ductus endolymfaticus. Bij EDB wordt de ductus endolymfaticus daarna afgesloten met een clipje. Dit clipje is ook te zien op Figuur 2. Dat maakt deze nieuwe operatie anders de decompressie-techniek. Hierdoor is er geen vochtuitwisseling tussen de saccus endolymfaticus en het binnenoor mogelijk. Hierdoor ontstaat er geen vochtoverschot in het binnenoor, waardoor de Ménière-aanvallen waarschijnlijk wegblijven.

In deze studie wordt EDB vergeleken met de saccusdecompressie. Zoals hierboven beschreven staat, lijken deze operaties op elkaar. Bij EDB wordt echter na het 'decomprimeren' nog een clip geplaatst.

**Proefpersoneninformatie EDB bij de ziekte van Ménière – Juni 2021**

Proefpersoneninformatie

**Bijlage E: toestemmingsformulier proefpersoon**

Behorende bij

EDB bij de ziekte van Ménière

- Ik heb de informatiebrief gelezen. Ook kon ik vragen stellen. Mijn vragen zijn goed genoeg beantwoord. Ik had genoeg tijd om te beslissen of ik meedoe.
- Ik weet dat meedoen vrijwillig is. Ook weet ik dat ik op ieder moment kan beslissen om toch niet mee te doen met het onderzoek. Of om ermee te stoppen. Ik hoef dan niet te zeggen waarom ik wil stoppen.
- Ik geef de onderzoeker toestemming om mijn huisarts te laten weten dat ik meedoe aan dit onderzoek.
- Ik geef de onderzoeker toestemming om mijn huisarts of specialist informatie te geven over onverwachte bevindingen uit het onderzoek die van belang zijn voor mijn gezondheid.
- Ik geef de onderzoekers toestemming om mijn gegevens te verzamelen en gebruiken. De onderzoekers doen dit alleen om de onderzoeksvraag van dit onderzoek te beantwoorden.
- Ik weet dat voor de controle van het onderzoek sommige mensen al mijn gegevens kunnen inzien. Die mensen staan in deze informatiebrief. Ik geef deze mensen toestemming om mijn gegevens in te zien voor deze controle.
- Ik weet dat ik niet zwanger mag worden tijdens het onderzoek.
- De onderzoeker heeft met mij besproken hoe ik het beste voorkom dat ik zwanger word.
- Wilt u in de tabel hieronder ja of nee aankruisen?

|                                                                                                                               |                             |                              |
|-------------------------------------------------------------------------------------------------------------------------------|-----------------------------|------------------------------|
| Ik geef toestemming om mijn gegevens te bewaren om dit te gebruiken voor ander onderzoek, zoals in de informatiebrief staat.  | Ja <input type="checkbox"/> | Nee <input type="checkbox"/> |
| Ik geef toestemming om mij eventueel na dit onderzoek te vragen of ik wil meedoen met een vervolgonderzoek.                   | Ja <input type="checkbox"/> | Nee <input type="checkbox"/> |
| Ik geef de onderzoekers toestemming om na het onderzoek te laten weten welke behandeling ik heb gehad/ in welke groep ik zat. | Ja <input type="checkbox"/> | Nee <input type="checkbox"/> |

- Ik wil meedoen aan dit onderzoek.

Mijn naam is (proefpersoon): .....

Handtekening: .....

Datum : \_\_ / \_\_ / \_\_

-----

**Proefpersoneninformatie EDB bij de ziekte van Ménière – Juni 2021**

Proefpersoneninformatie

Ik verklaar dat ik deze proefpersoon volledig heb geïnformeerd over het genoemde onderzoek.

Wordt er tijdens het onderzoek informatie bekend die de toestemming van de proefpersoon kan beïnvloeden? Dan laat ik dit op tijd weten aan deze proefpersoon.

Naam onderzoeker (of diens vertegenwoordiger):.....

Handtekening:.....

Datum: \_\_ / \_\_ / \_\_

**<indien van toepassing>**

Aanvullende informatie is gegeven door:

Naam:.....

Functie:.....

Handtekening:.....

Datum: \_\_ / \_\_ / \_\_

*De proefpersoon krijgt een volledige informatiebrief mee, samen met een getekende versie van het toestemmingsformulier.*
